# Supplementary material for: Bulk- and surface-modified combinable PDMS capillary sensor array as an easy-to-use sensing device with enhanced sensitivity to elevated concentrations of multiple serum sample components
Source: Royal Society of Chemistry journal article supplement (doi:10.1039/c2lc21242k), 2012-01-01
Supplement: c2lc21242k.pdf [file c2lc21242k.pdf]

## Supporting Information

### **Bulk- and Surface-Modified Combinable PDMS Capillary Sensor Array as Easy-to-use Multi Sensing Device with Enhanced Sensitivity for Discriminating Elevated Concentration Component in Serum Sample**

Yuji Fujii, Terence G. Henares, Kunio Kawamura, Tatsuro Endo, and Hideaki Hisamoto\*

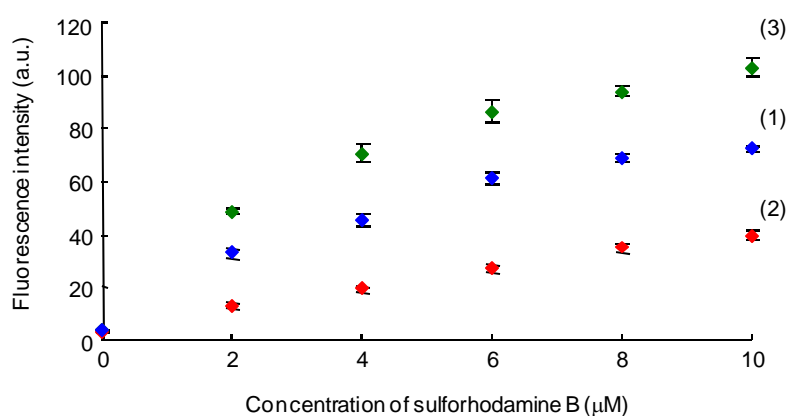

Figure S1 Calibration curves of sulforhodamine B solutions using different CPCs.  
(1)Conventional CPC, (2)Bulk modified CPC, (3)Surface modified CPC  
(Error bar represents relative standard deviation (n=3))
